# Supplementary material
Source: Springer Nature journal article supplement (https://www.springermedizin.de/resource/supplementary/12913_2005_229_MOESM3_ESM.doc/9534638)

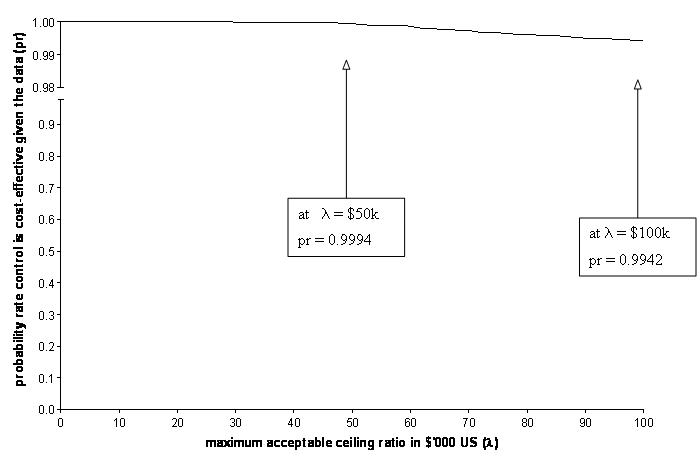

Supplement: MOESM3 [file 9534638]
